# Supplementary material for: Using satellite observations of precipitation and soil moisture toconstrain the water budget of a land surface model
Source: Copernicus journal article supplement (doi:10.5194/hess-2017-705), 2017-12-22
Supplement: Supplementary file [file SC1_response.pdf › SC1_response.pdf]

### **Author response to SC1**

We thank the author for their short comment which has helped to strengthen our manuscript. Please find our response below:

1) The author asked if the CCI product used is CDF matched to the GLDAS- NOAH model and if so requested that we include different performance metrics.

We are using the level 3 combined product which is CDF matched to the GLDAS- NOAH model, we agree that including different performance metrics is best to show the reduction in random errors. We have included ubRMSD and temporal correlation as suggested.

2) The author comments that it would be very desirable to repeat this experiment over a data rich area in order to have much better ground based verification.

We agree this would be very beneficial to look at and we would be excited to talk to the author more about possibilities for the future. The work in this paper formed part of the ERADACS project which was based in Ghana, it was therefore necessary that the focus of the paper was over this region. Please do contact me for further discussion:  
e.pinnington@reading.ac.uk
